# Supplementary material for: Essential and Toxic Mineral Content and Fatty Acid Profile of Colostrum in Dairy Sheep
Source: MDPI journal article supplement (doi:10.3390/ani12202730), 2022-10-11
Supplement: s1 [file s1]

# Essential and toxic minerals content and fatty acid profile of colostrum in dairy sheep

Maria Francesca Guiso <sup>1</sup>, Gianni Battacone <sup>1</sup>, Linda Canu <sup>1</sup>, Mario Deroma<sup>1</sup>, Ilaria Langasco <sup>2</sup>, Gavino Sanna <sup>2</sup>, Eleni Tsiplakou<sup>3</sup>, Giuseppe Pulina <sup>1</sup>, and Anna Nudda <sup>1,\*</sup>

## Supplementary Material

**Table S1.** Microwave-assisted procedure of mineralization of sheep's colostrum and milk samples.

|                        |                                                                                                                                                                                                       |
|------------------------|-------------------------------------------------------------------------------------------------------------------------------------------------------------------------------------------------------|
| Content of each vessel | Sample weight: ca. 1 g (exactly weighted, uncertainty: 0.0001 g); HNO <sub>3</sub> 67%: 2 cm <sup>3</sup> ; H <sub>2</sub> O <sub>2</sub> 30%: 2 cm <sup>3</sup> ; ultrapure water: 7 cm <sup>3</sup> |
| Heating step           | From room temperature to 200°C in 15 minutes, power: 1800W                                                                                                                                            |
| Standing step          | 200°C for 15 minutes, power: 1800W                                                                                                                                                                    |
| Cooling step           | From 200°C to room temperature in 15 minutes.                                                                                                                                                         |

**Table S2.** ICP-MS instrumental settings for the determination of oligoelements and toxic element in sheep's colostrum and milk.

|                                                        |                  |                                                   |                                                        |
|--------------------------------------------------------|------------------|---------------------------------------------------|--------------------------------------------------------|
| RF power generator (W)                                 | 1300             | KED gas                                           | Helium, 99.999%                                        |
| Ar plasma flow (dm <sup>3</sup> min <sup>-1</sup> )    | 17.995           | Masses of optimization                            | <sup>7</sup> Li, <sup>89</sup> Y and <sup>205</sup> Tl |
| Ar auxiliary flow (dm <sup>3</sup> min <sup>-1</sup> ) | 1.203            | Dwell time (ms)                                   | 50                                                     |
| Ar nebulizer flow (dm <sup>3</sup> min <sup>-1</sup> ) | 0.991            | Number of points per peak                         | 3                                                      |
| Nebulizer                                              | Meinhard®, glass | Acquisition time (s)                              | 3                                                      |
| Spray chamber                                          | Cyclonic, glass  | Quantification                                    | External calibration                                   |
| Skimmer and sampling cones                             | Nickel           | KED gas flow (cm <sup>3</sup> min <sup>-1</sup> ) | 3.5                                                    |
| Sampling depth (mm)                                    | 0                | Masses of optimization                            | <sup>7</sup> Li, <sup>89</sup> Y and <sup>205</sup> Tl |

  

| Element | Quantification isotopic ion (% elemental abundance) | Interferents                                                                                                                                                                | Analysing mode | Correction equation |
|---------|-----------------------------------------------------|-----------------------------------------------------------------------------------------------------------------------------------------------------------------------------|----------------|---------------------|
| Cd      | <sup>111</sup> Cd <sup>+</sup> (12.80)              | <sup>95</sup> Mo <sup>16</sup> O <sup>+</sup>                                                                                                                               | Normal         |                     |
| Cu      | <sup>63</sup> Cu <sup>+</sup> (69.17)               | <sup>31</sup> P <sup>16</sup> O <sub>2</sub> <sup>+</sup> ; <sup>47</sup> Ti <sup>16</sup> O <sup>+</sup> ; <sup>126</sup> Te <sup>2+</sup>                                 | Normal         |                     |
| Mn      | <sup>55</sup> Mn <sup>+</sup> (100)                 | <sup>40</sup> Ar <sup>14</sup> N <sup>1</sup> H <sup>+</sup> ; <sup>1</sup> H <sup>37</sup> Cl <sup>17</sup> O <sup>+</sup> ; <sup>37</sup> Cl <sup>18</sup> O <sup>+</sup> | Normal         |                     |
| Ni      | <sup>60</sup> Ni <sup>+</sup> (26.22)               | <sup>44</sup> Ca <sup>16</sup> O <sup>+</sup>                                                                                                                               | Normal         |                     |
| Pb      | <sup>208</sup> Pb <sup>+</sup> (52.40)              |                                                                                                                                                                             | Normal         |                     |

---

|           |                                       |                                                                                                                                                                                            |        |                            |
|-----------|---------------------------------------|--------------------------------------------------------------------------------------------------------------------------------------------------------------------------------------------|--------|----------------------------|
| <b>Se</b> | <sup>82</sup> Se <sup>+</sup> (8.73)  | <sup>82</sup> Kr <sup>+</sup> ; <sup>81</sup> Br <sup>1</sup> H <sup>+</sup> ; <sup>40</sup> Ar <sub>2</sub> H <sup>+</sup> ; Ho <sup>2+</sup> ; Gd <sup>2+</sup> ; Er <sup>2+</sup>       | KED    | -0.00783x <sup>83</sup> Kr |
| <b>Zn</b> | <sup>66</sup> Zn <sup>+</sup> (27.90) | <sup>50</sup> Ti <sup>16</sup> O <sup>+</sup> ; <sup>50</sup> V <sup>16</sup> O <sup>+</sup> ; <sup>34</sup> S <sup>16</sup> O <sub>2</sub> <sup>+</sup> ; <sup>132</sup> Ba <sup>2+</sup> | Normal |                            |

---

**Table S3.** Validation parameters for the determination of oligoelements and toxic element in sheep's colostrum and milk.

| Sensitivity |                               |                               | Linearity                       |                                 | Precision                                 |                                    | Trueness                                 | CRM Certified concentration |                        |
|-------------|-------------------------------|-------------------------------|---------------------------------|---------------------------------|-------------------------------------------|------------------------------------|------------------------------------------|-----------------------------|------------------------|
| Element     | LoD<br>(µg dm <sup>-3</sup> ) | LoQ<br>(µg dm <sup>-3</sup> ) | Range<br>(µg kg <sup>-1</sup> ) | Regression line                 | Correlation coefficient<br>R <sup>2</sup> | Repeatability <sup>a</sup><br>(CV) | Intermediate precision <sup>b</sup> (CV) | Recovery<br>(%)             | (mg kg <sup>-1</sup> ) |
| Cd          | 0.0002                        | 0.0007                        | 0.04-40                         | y = (4920±10) x + (491±20)      | 1                                         | 4.1 <sup>c</sup>                   | 18 <sup>c</sup>                          | 110 <sup>c</sup>            | 0.002 <sup>c</sup>     |
|             |                               |                               |                                 |                                 |                                           | 4.2 <sup>d</sup>                   | 8.3 <sup>d</sup>                         | 98 <sup>d</sup>             | 0.106 <sup>d</sup>     |
| Cu          | 0.014                         | 0.048                         | 0.2-200                         | y = (20800±100) x + (8190±40)   | 1                                         | 9.7 <sup>c</sup>                   | 7.7 <sup>c</sup>                         | 105 <sup>c</sup>            | 4.3 <sup>c</sup>       |
|             |                               |                               |                                 |                                 |                                           | 5.0 <sup>d</sup>                   | 2.7 <sup>d</sup>                         | 90 <sup>d</sup>             | 5.0 <sup>d</sup>       |
| Mn          | 0.005                         | 0.018                         | 0.15-150                        | y = (68570±200) x + (14270±150) | 1                                         | 3.0 <sup>c</sup>                   | 3.6 <sup>c</sup>                         | 107 <sup>c</sup>            | 1.04 <sup>c</sup>      |
|             |                               |                               |                                 |                                 |                                           | 8.0 <sup>d</sup>                   | 6.9 <sup>d</sup>                         | 102 <sup>d</sup>            | 0.29 <sup>d</sup>      |
| Ni          | 0.0008                        | 0.0027                        | 0.25-250                        | y = (10490±300) x – (4610±100)  | 1                                         | 7.1 <sup>c</sup>                   | 8.4 <sup>c</sup>                         | 10 <sup>c</sup>             | 0.011 <sup>c</sup>     |
|             |                               |                               |                                 |                                 |                                           | 8.0 <sup>d</sup>                   | 9.0 <sup>d</sup>                         | 107 <sup>d</sup>            | 0.28 <sup>d</sup>      |
| Pb          | 0.001                         | 0.003                         | 0.09-90                         | y = (27720±250) x – (5510±200)  | 0.9999                                    | 3.9 <sup>c</sup>                   | 14 <sup>c</sup>                          | 113 <sup>c</sup>            | 0.12 <sup>c</sup>      |
|             |                               |                               |                                 |                                 |                                           | 2.7 <sup>d</sup>                   | 3.6 <sup>d</sup>                         | 91 <sup>d</sup>             | 0.207 <sup>d</sup>     |
| Se          | 0.0008                        | 0.0026                        | 0.1-100                         | y = (25±5) x + (20±1)           | 0.9999                                    | 3.7 <sup>c</sup>                   | 4.2 <sup>c</sup>                         | 100 <sup>c</sup>            | 0.24 <sup>c</sup>      |
|             |                               |                               |                                 |                                 |                                           | 4.6 <sup>d</sup>                   | 11 <sup>d</sup>                          | 95 <sup>d</sup>             | 0.19 <sup>d</sup>      |
| Zn          | 0.006                         | 0.021                         | 0.35-350                        | y = (5310±50)x + (19260±400)    | 1                                         | 4.4 <sup>c</sup>                   | 2.5 <sup>c</sup>                         | 97 <sup>c</sup>             | 13 <sup>c</sup>        |
|             |                               |                               |                                 |                                 |                                           | 2.3 <sup>d</sup>                   | 5.6 <sup>d</sup>                         | 95 <sup>d</sup>             | 44.9 <sup>d</sup>      |

LoD, limit of detection; LoQ, limit of quantification; CV, coefficient of variation; <sup>a</sup> parameter evaluated repeating the analysis of a CRM for five times within the same analytical session; <sup>b</sup> parameter evaluated repeating the analysis of a CRM on five different analytical sessions performed within one month; <sup>c</sup> measured on IAEA-A-13 certified reference sample, <sup>d</sup> measured on ERM-BD151 certified reference sample; CRM concentration in *italics* is a not certified data; n = 5.

1

2

3

4

**Table S4.** Average concentration (% on total amount of FAs) of all FAs measured in colostrum of each of the eight farms

| Farms               |          |          |          |          |          |          |          |          |         |        |
|---------------------|----------|----------|----------|----------|----------|----------|----------|----------|---------|--------|
|                     | A        | B        | C        | D        | E        | F        | G        | H        | P value | SEM    |
| Fat, %              | 5.3 c    | 7.6 abc  | 7.7 abc  | 9.6 ab   | 6.9 abc  | 5.5 bc   | 9.1 abc  | 10.2 a   | 0.0013  | 0.3575 |
| FA (% on Total FAs) |          |          |          |          |          |          |          |          |         |        |
| Short chain FA      |          |          |          |          |          |          |          |          |         |        |
| C4:0                | 1.93 ab  | 1.96 ab  | 1.70 b   | 1.83 bc  | 2.22 a   | 1.99 ab  | 1.66 b   | 1.60 b   | 0.0041  | 0.0427 |
| C6:0                | 0.69 b   | 0.84 b   | 0.73 b   | 0.67 b   | 1.13 a   | 0.60 b   | 0.71 b   | 0.58 b   | <0.0001 | 0.0270 |
| C7:0                | 0.04 bc  | 0.04 bc  | 0.03 c   | 0.05 bc  | 0.05 bc  | 0.12 a   | 0.05 b   | 0.04 c   | <0.0001 | 0.0027 |
| C8:0                | 0.49 b   | 0.66 b   | 0.57 b   | 0.50 b   | 0.92 a   | 0.39 b   | 0.53 b   | 0.43 b   | <0.0001 | 0.0259 |
| C9:0                | 0.08 b   | 0.10 b   | 0.08 b   | 0.10 b   | 0.11 b   | 0.22 a   | 0.10 b   | 0.08 b   | <0.0001 | 0.0053 |
| C10:0               | 1.54 bc  | 2.14 b   | 1.78 bc  | 1.55 bc  | 3.04 a   | 1.23 bc  | 1.68 bc  | 1.28 c   | <0.0001 | 0.0885 |
| C10:1               | 0.07 ab  | 0.06 abc | 0.06 abc | 0.07 ab  | 0.08 ab  | 0.03 c   | 0.05 bc  | 0.08 a   | <0.0001 | 0.0028 |
| Medium chain FA     |          |          |          |          |          |          |          |          |         |        |
| C11:0               | 0.11 bc  | 0.14 b   | 0.11 bc  | 0.12 bc  | 0.22 a   | 0.09 bc  | 0.10 bc  | 0.09 c   | <0.0001 | 0.0063 |
| C12:0               | 1.98 b   | 2.12 b   | 2.01 b   | 2.13 b   | 2.74 a   | 1.72 b   | 1.93 b   | 1.77 b   | <0.0001 | 0.0509 |
| isoC13:0            | 0.01     | 0.01     | 0.01     | 0.01     | 0.01     | 0.01     | 0.01     | 0.01     | 0.4431  | 0.0004 |
| anteisoC13:0        | 0.03 b   | 0.03 ab  | 0.03 b   | 0.04 ab  | 0.05 a   | 0.03 b   | 0.03 b   | 0.03 b   | 0.0003  | 0.0013 |
| isoC14:0            | 0.06 ab  | 0.06 ab  | 0.06 ab  | 0.05 ab  | 0.05 ab  | 0.05 ab  | 0.07 a   | 0.04 b   | 0.0352  | 0.0018 |
| C14:0               | 11.01 bc | 11.75 ab | 9.96 bc  | 11.78 ab | 14.35 a  | 10.62 bc | 8.86 c   | 9.19 bc  | <0.0001 | 0.2857 |
| isoC15:0            | 0.19     | 0.19     | 0.16     | 0.17     | 0.16     | 0.20     | 0.19     | 0.17     | 0.0188  | 0.0038 |
| anteisoC15:0        | 0.20     | 0.23     | 0.17     | 0.20     | 0.22     | 0.21     | 0.22     | 0.17     | 0.0561  | 0.0055 |
| C14:1c9             | 0.39 b   | 0.47 ab  | 0.26 b   | 0.48 ab  | 0.73 a   | 0.42 b   | 0.23 b   | 0.31 b   | <0.0001 | 0.0258 |
| C15:0               | 0.55 bc  | 0.64 ab  | 0.52 bc  | 0.52 bc  | 0.72 a   | 0.49 bc  | 0.61 abc | 0.47 c   | <0.0001 | 0.0150 |
| C15:1               | 0.03 b   | 0.03 b   | 0.03 b   | 0.02 b   | 0.05 a   | 0.03 b   | 0.03 b   | 0.03 b   | <0.0001 | 0.0013 |
| isoC16:0            | 0.20 ab  | 0.21 ab  | 0.19 ab  | 0.19 ab  | 0.19 ab  | 0.21 ab  | 0.22 a   | 0.17 b   | 0.0473  | 0.0040 |
| C16:0               | 27.19 bc | 31.47 b  | 25.67 c  | 29.11 bc | 37.12 a  | 27.92 bc | 25.56 c  | 25.84 c  | <0.0001 | 0.5818 |
| isoC17:0            | 0.42 bc  | 0.40 cd  | 0.41 bcd | 0.39 cd  | 0.34 d   | 0.49 ab  | 0.50 a   | 0.43 abc | <0.0001 | 0.0078 |
| anteisoC17:0        | 0.46 b   | 0.45 bc  | 0.44 bc  | 0.45 bc  | 0.36 c   | 0.51 ab  | 0.57 a   | 0.51 ab  | <0.0001 | 0.0097 |
| C16:1c9             | 1.38 b   | 1.85 ab  | 1.08 b   | 1.78 ab  | 2.63 a   | 1.72 ab  | 1.08 b   | 1.24 b   | <0.0001 | 0.0872 |
| C17:0               | 0.81 b   | 0.86 ab  | 0.83 b   | 0.78 b   | 0.68 b   | 0.84 ab  | 1.03 a   | 0.87 ab  | 0.0003  | 0.0185 |
| isoC18:0            | 0.11 bc  | 0.12 ab  | 0.12 bc  | 0.12 bc  | 0.08 c   | 0.12 abc | 0.15 a   | 0.13 ab  | <0.0001 | 0.0035 |
| C17:1c9             | 0.43 bc  | 0.43 bc  | 0.46 ab  | 0.45 abc | 0.33 c   | 0.48 ab  | 0.54 a   | 0.48 ab  | <0.0001 | 0.0107 |
| Long chain FA       |          |          |          |          |          |          |          |          |         |        |
| C18:0               | 7.51 ab  | 7.29 ab  | 8.06 a   | 7.19 ab  | 5.02 b   | 6.64 ab  | 7.78 a   | 8.18 a   | 0.0130  | 0.2206 |
| C18:1t9             | 0.22 ab  | 0.17 c   | 0.26 a   | 0.20 bc  | 0.15 c   | 0.21 abc | 0.23 ab  | 0.24 ab  | <0.0001 | 0.0057 |
| C18:1t10            | 0.24     | 0.23     | 0.34     | 0.20     | 0.30     | 0.20     | 0.29     | 0.25     | 0.4630  | 0.0183 |
| C18:1t11            | 0.81 a   | 0.59 ab  | 0.78 ab  | 0.56 ab  | 0.49 b   | 0.82 ab  | 0.71 ab  | 0.57 ab  | 0.0068  | 0.0276 |
| C18:1t12            | 0.27 ab  | 0.16 c   | 0.31 a   | 0.20 bc  | 0.18 c   | 0.24 abc | 0.27 ab  | 0.23 abc | <0.0001 | 0.0083 |
| C18:1t13:t14        | 0.36 a   | 0.25 ab  | 0.30 ab  | 0.29 ab  | 0.34 ab  | 0.33 ab  | 0.28 ab  | 0.22 b   | 0.0350  | 0.0118 |
| C18:1c9             | 30.52 ab | 25.99 b  | 32.68 a  | 29.40 ab | 17.18 c  | 31.26 ab | 33.35 a  | 35.76 a  | <0.0001 | 0.7795 |
| C18:2n6 (LA)        | 2.24 b   | 2.21 b   | 2.92 ab  | 2.43 b   | 2.34 b   | 2.08 b   | 3.24 b   | 2.70 ab  | 0.0002  | 0.0744 |
| C20:0               | 0.23 ab  | 0.22 ab  | 0.22 ab  | 0.19 bc  | 0.17 c   | 0.26 a   | 0.26 a   | 0.19 bc  | <0.0001 | 0.0051 |
| C18:3n6             | 0.04 b   | 0.05 a   | 0.05 ab  | 0.04 ab  | 0.05 ab  | 0.04 b   | 0.05 ab  | 0.05 ab  | 0.0107  | 0.0014 |
| C20:1c9             | 0.04 a   | 0.03 abc | 0.03 abc | 0.03 bc  | 0.02 c   | 0.03 abc | 0.03 ab  | 0.02 c   | 0.0001  | 0.0009 |
| C18:3n3 (ALA)       | 0.61 a   | 0.46 bcd | 0.33 de  | 0.37 cd  | 0.41 bcd | 0.56 ab  | 0.49 abc | 0.21 e   | <0.0001 | 0.0170 |
| CLAc9t11            | 0.89 a   | 0.56 cd  | 0.81 ab  | 0.61 bcd | 0.47 d   | 0.92 a   | 0.71 abc | 0.58 cd  | <0.0001 | 0.0239 |
| CLAt10c12           | 0.03 ab  | 0.03 bc  | 0.03 bc  | 0.02 cd  | 0.02 cd  | 0.04 a   | 0.03 cd  | 0.02 d   | <0.0001 | 0.0009 |
| CLAt12t14           | 0.02 a   | 0.01 c   | 0.01 abc | 0.01 bc  | 0.01 bc  | 0.02 a   | 0.01 ab  | 0.01 c   | <0.0001 | 0.0005 |
| CLAt11t13           | 0.03 ab  | 0.04 a   | 0.03 ab  | 0.03 ab  | 0.03 ab  | 0.04 ab  | 0.03 b   | 0.03 b   | 0.011   | 0.0009 |
| CLAt9t11            | 0.02 a   | 0.02 ab  | 0.02 b   | 0.02 b   | 0.02 ab  | 0.02 ab  | 0.02 b   | 0.01 b   | <0.0001 | 0.0007 |
| C18:4n3             | 0.01     | 0.01     | 0.01     | 0.01     | 0.01     | 0.01     | 0.01     | 0.01     | 0.3227  | 0.0003 |

|                         |                     |                     |                    |                     |                     |                     |                      |                      |         |        |
|-------------------------|---------------------|---------------------|--------------------|---------------------|---------------------|---------------------|----------------------|----------------------|---------|--------|
| <b>C20:2n6</b>          | 0.02                | 0.03                | 0.03               | 0.03                | 0.03                | 0.02                | 0.03                 | 0.03                 | 0.2705  | 0.0007 |
| <b>C20:3n9</b>          | 0.07                | 0.07                | 0.06               | 0.08                | 0.06                | 0.08                | 0.07                 | 0.06                 | 0.0284  | 0.0016 |
| <b>C22:0</b>            | 0.07 <sup>ab</sup>  | 0.07 <sup>ab</sup>  | 0.06 <sup>ab</sup> | 0.05 <sup>b</sup>   | 0.06 <sup>ab</sup>  | 0.07 <sup>ab</sup>  | 0.09 <sup>a</sup>    | 0.05 <sup>b</sup>    | 0.0013  | 0.0027 |
| <b>C20:3n6</b>          | 0.03 <sup>b</sup>   | 0.03 <sup>ab</sup>  | 0.04 <sup>a</sup>  | 0.04 <sup>ab</sup>  | 0.04 <sup>ab</sup>  | 0.03 <sup>b</sup>   | 0.03 <sup>ab</sup>   | 0.04 <sup>ab</sup>   | 0.0009  | 0.0008 |
| <b>C20:4n6 (ARA)</b>    | 0.26 <sup>c</sup>   | 0.27 <sup>bc</sup>  | 0.33 <sup>ab</sup> | 0.32 <sup>abc</sup> | 0.28 <sup>bc</sup>  | 0.24 <sup>c</sup>   | 0.39 <sup>a</sup>    | 0.37 <sup>a</sup>    | <0.0001 | 0.0081 |
| <b>C23:0</b>            | 0.02                | 0.03                | 0.02               | 0.02                | 0.02                | 0.02                | 0.03                 | 0.01                 | 0.0579  | 0.0013 |
| <b>EPA</b>              | 0.10 <sup>a</sup>   | 0.08 <sup>b</sup>   | 0.07 <sup>b</sup>  | 0.07 <sup>bc</sup>  | 0.07 <sup>b</sup>   | 0.08 <sup>ab</sup>  | 0.07 <sup>b</sup>    | 0.05 <sup>c</sup>    | <0.0001 | 0.0023 |
| <b>DPA</b>              | 0.24 <sup>a</sup>   | 0.16 <sup>bc</sup>  | 0.18 <sup>bc</sup> | 0.14 <sup>cd</sup>  | 0.16 <sup>bcd</sup> | 0.20 <sup>ab</sup>  | 0.20 <sup>ab</sup>   | 0.11 <sup>d</sup>    | <0.0001 | 0.0059 |
| <b>DHA</b>              | 0.09 <sup>a</sup>   | 0.06 <sup>b</sup>   | 0.06 <sup>b</sup>  | 0.05 <sup>bc</sup>  | 0.06 <sup>b</sup>   | 0.06 <sup>ab</sup>  | 0.06 <sup>b</sup>    | 0.03 <sup>c</sup>    | <0.0001 | 0.0024 |
| <b>Groups of FA</b>     |                     |                     |                    |                     |                     |                     |                      |                      |         |        |
| <b>SCFA</b>             | 4.84 <sup>bc</sup>  | 5.80 <sup>b</sup>   | 4.96 <sup>bc</sup> | 4.77 <sup>bc</sup>  | 7.55 <sup>a</sup>   | 4.59 <sup>bc</sup>  | 4.79 <sup>bc</sup>   | 4.09 <sup>c</sup>    | <0.0001 | 0.1653 |
| <b>MCFA</b>             | 46.47 <sup>bc</sup> | 52.23 <sup>b</sup>  | 43.35 <sup>c</sup> | 49.58 <sup>bc</sup> | 61.79 <sup>a</sup>  | 47.02 <sup>bc</sup> | 42.77 <sup>c</sup>   | 42.73 <sup>c</sup>   | <0.0001 | 0.9431 |
| <b>LCFA</b>             | 48.69 <sup>ab</sup> | 41.97 <sup>b</sup>  | 51.68 <sup>a</sup> | 45.65 <sup>ab</sup> | 30.66 <sup>c</sup>  | 48.40 <sup>ab</sup> | 52.44 <sup>a</sup>   | 53.18 <sup>a</sup>   | <0.0001 | 1.0364 |
| <b>SFA</b>              | 56.17 <sup>bc</sup> | 62.25 <sup>b</sup>  | 54.15 <sup>c</sup> | 58.41 <sup>bc</sup> | 70.21 <sup>a</sup>  | 55.27 <sup>bc</sup> | 53.16 <sup>c</sup>   | 52.50 <sup>c</sup>   | <0.0001 | 0.8262 |
| <b>MUFA</b>             | 37.62 <sup>ab</sup> | 32.72 <sup>b</sup>  | 39.57 <sup>a</sup> | 36.27 <sup>ab</sup> | 24.82 <sup>c</sup>  | 38.73 <sup>ab</sup> | 40.07 <sup>a</sup>   | 42.17 <sup>a</sup>   | <0.0001 | 0.7501 |
| <b>PUFA</b>             | 6.19 <sup>ab</sup>  | 5.01 <sup>b</sup>   | 6.27 <sup>ab</sup> | 5.31 <sup>b</sup>   | 4.95 <sup>b</sup>   | 5.99 <sup>ab</sup>  | 6.75 <sup>a</sup>    | 5.32 <sup>b</sup>    | <0.0001 | 0.1261 |
| <b>UFA</b>              | 43.81 <sup>ab</sup> | 37.74 <sup>b</sup>  | 45.83 <sup>a</sup> | 41.58 <sup>ab</sup> | 29.78 <sup>c</sup>  | 44.72 <sup>ab</sup> | 46.82 <sup>a</sup>   | 47.49 <sup>a</sup>   | <0.0001 | 0.8264 |
| <b>OCFA</b>             | 1.62 <sup>bc</sup>  | 1.82 <sup>ab</sup>  | 1.60 <sup>bc</sup> | 1.60 <sup>bc</sup>  | 1.82 <sup>abc</sup> | 1.80 <sup>abc</sup> | 1.94 <sup>a</sup>    | 1.56 <sup>c</sup>    | <0.0001 | 0.0240 |
| <b>BCFA</b>             | 1.69 <sup>bc</sup>  | 1.71 <sup>bc</sup>  | 1.59 <sup>bc</sup> | 1.62 <sup>bc</sup>  | 1.47 <sup>c</sup>   | 1.83 <sup>ab</sup>  | 1.97 <sup>a</sup>    | 1.66 <sup>bc</sup>   | <0.0001 | 0.0253 |
| <b>OBCFA</b>            | 3.32 <sup>b</sup>   | 3.53 <sup>ab</sup>  | 3.19 <sup>b</sup>  | 3.22 <sup>b</sup>   | 3.28 <sup>b</sup>   | 3.63 <sup>ab</sup>  | 3.91 <sup>a</sup>    | 3.22 <sup>b</sup>    | <0.0001 | 0.0434 |
| <b>PUFA6</b>            | 2.67 <sup>bc</sup>  | 2.67 <sup>bc</sup>  | 3.45 <sup>ab</sup> | 2.95 <sup>bc</sup>  | 2.81 <sup>bc</sup>  | 2.47 <sup>c</sup>   | 3.83 <sup>a</sup>    | 3.28 <sup>abc</sup>  | <0.0001 | 0.0818 |
| <b>PUFA3</b>            | 1.07 <sup>a</sup>   | 0.80 <sup>bcd</sup> | 0.67 <sup>cd</sup> | 0.64 <sup>d</sup>   | 0.74 <sup>bcd</sup> | 0.94 <sup>ab</sup>  | 0.84 <sup>bc</sup>   | 0.42 <sup>e</sup>    | <0.0001 | 0.0257 |
| <b>n6/n3</b>            | 2.50 <sup>e</sup>   | 3.31 <sup>cd</sup>  | 5.20 <sup>b</sup>  | 4.61 <sup>b</sup>   | 3.77 <sup>c</sup>   | 2.63 <sup>de</sup>  | 4.68 <sup>b</sup>    | 7.76 <sup>a</sup>    | <0.0001 | 0.1847 |
| <b>n3/n6</b>            | 0.40 <sup>a</sup>   | 0.31 <sup>b</sup>   | 0.19 <sup>d</sup>  | 0.22 <sup>cd</sup>  | 0.27 <sup>bc</sup>  | 0.38 <sup>a</sup>   | 0.22 <sup>d</sup>    | 0.13 <sup>e</sup>    | <0.0001 | 0.0104 |
| <b>CLA</b>              | 1.05 <sup>a</sup>   | 0.70 <sup>cd</sup>  | 0.94 <sup>ab</sup> | 0.73 <sup>bcd</sup> | 0.60 <sup>d</sup>   | 1.09 <sup>a</sup>   | 0.84 <sup>abc</sup>  | 0.68 <sup>cd</sup>   | <0.0001 | 0.0255 |
| <b>TFA</b>              | 4.01 <sup>a</sup>   | 2.74 <sup>d</sup>   | 3.94 <sup>ab</sup> | 2.97 <sup>bcd</sup> | 2.77 <sup>cd</sup>  | 3.90 <sup>abc</sup> | 3.63 <sup>abcd</sup> | 3.07 <sup>abcd</sup> | <0.0001 | 0.0980 |
| <b>TFA (without VA)</b> | 3.20 <sup>a</sup>   | 2.15 <sup>c</sup>   | 3.16 <sup>a</sup>  | 2.41 <sup>bc</sup>  | 2.28 <sup>bc</sup>  | 3.08 <sup>ab</sup>  | 2.92 <sup>ab</sup>   | 2.50 <sup>abc</sup>  | <0.0001 | 0.0724 |
| <b>AI</b>               | 1.70 <sup>bc</sup>  | 2.22 <sup>b</sup>   | 1.52 <sup>bc</sup> | 2.01 <sup>bc</sup>  | 3.45 <sup>a</sup>   | 1.69 <sup>bc</sup>  | 1.35 <sup>c</sup>    | 1.39 <sup>c</sup>    | <0.0001 | 0.0945 |
| <b>TI</b>               | 1.63 <sup>bc</sup>  | 2.20 <sup>b</sup>   | 1.55 <sup>bc</sup> | 2.00 <sup>bc</sup>  | 3.33 <sup>a</sup>   | 1.68 <sup>bc</sup>  | 1.41 <sup>c</sup>    | 1.48 <sup>bc</sup>   | <0.0001 | 0.0883 |
| <b>h/H</b>              | 0.94 <sup>ab</sup>  | 0.72 <sup>bc</sup>  | 1.08 <sup>c</sup>  | 0.87 <sup>ab</sup>  | 0.44 <sup>c</sup>   | 0.97 <sup>ab</sup>  | 1.13 <sup>a</sup>    | 1.17 <sup>a</sup>    | <0.0001 | 0.0357 |
| <b>DI C10:1</b>         | 4.23 <sup>ab</sup>  | 3.12 <sup>b</sup>   | 3.67 <sup>b</sup>  | 4.26 <sup>ab</sup>  | 2.54 <sup>b</sup>   | 2.69 <sup>b</sup>   | 2.80 <sup>b</sup>    | 5.96 <sup>a</sup>    | <0.0001 | 0.1812 |
| <b>DI C14:1</b>         | 3.25 <sup>ab</sup>  | 3.75 <sup>ab</sup>  | 2.52 <sup>b</sup>  | 3.78 <sup>ab</sup>  | 4.62 <sup>a</sup>   | 3.48 <sup>ab</sup>  | 2.51 <sup>b</sup>    | 3.10 <sup>b</sup>    | 0.0001  | 0.1279 |
| <b>DI C16:1</b>         | 4.79 <sup>ab</sup>  | 5.41 <sup>ab</sup>  | 4.01 <sup>b</sup>  | 5.46 <sup>ab</sup>  | 6.42 <sup>a</sup>   | 5.48 <sup>ab</sup>  | 4.03 <sup>b</sup>    | 4.54 <sup>b</sup>    | 0.0004  | 0.1554 |
| <b>DI C18:1</b>         | 80.43               | 77.93               | 79.94              | 80.00               | 77.95               | 82.69               | 81.06                | 81.28                | 0.2057  | 0.4639 |
| <b>DI CLA</b>           | 52.81               | 49.25               | 50.85              | 52.43               | 51.59               | 54.18               | 49.96                | 51.32                | 0.7001  | 0.6582 |

ΣFAs = sum of all FAs; FAME = fatty acid methyl ester; SA = stearic acid; LA = linoleic acid; ALA =

linolenic acid; ARA=arachidonic acid; EPA = eicosapentaenoic acid; DPA = docosapentaenoic

acid; DHA = docosahexaenoic acid. SFA = sum of the individual saturated fatty acids; UFA = sum of the individual unsaturated fatty

acids; MUFA = sum of the individual monounsaturated fatty acids; PUFA = sum of the individual

polyunsaturated fatty acids; OCFA = odd-chain fatty acids; BCFA = branched-chain fatty acids, sum of iso- and anteiso-FA; OBCFA

= odd- and branched-chain fatty acids, sum of odd-, iso-, and anteiso-FA; SCFA, short-chain fatty acids (sum of individual fatty acids

from C4:0 to C10:0); MCFA = medium-chain fatty acids, sum of the individual fatty acids from C11:0 to C17:0; LCFA = long-chain

fatty acids, sum of the individual fatty acids from C18:0 to DHA; PUFA n-3 and PUFA n-6 = sum of individual n-3 and n-6 fatty acids,

respectively; CLA = sum of individual conjugated linoleic acids; TI = thrombogenic index; AI = atherogenic index; h:H =

hypcholesterolemic to hypercholesterolemic ratio.
